# Supplementary material for: Deprescribing intervention activities mapped to guiding principles for use in general practice: a scoping review
Source: HighWire-hosted journal article supplement (doi:10.1136/bmjopen-2021-052547), 2021-09-01
Supplement: bmjopen-2021-052547supp001_data_supplement.pdf [file bmjopen-2021-052547supp001_data_supplement.pdf]

**Appendix A: Search strategy and hits****Database search**

| Steps | Search terms – Embase                                                                                        | Hits     |
|-------|--------------------------------------------------------------------------------------------------------------|----------|
| 1     | Primary medical care/                                                                                        | 103586   |
| 2     | General practice/                                                                                            | 84531    |
| 3     | Primary health care/                                                                                         | 65513    |
| 4     | General practitioner/                                                                                        | 102079   |
| 5     | Primary care professional.ti,ab,kw.                                                                          | 64       |
| 6     | 1 or 2 or 3 or 4 or 5                                                                                        | 313405   |
| 7     | Controlled clinical trial/ or randomized controlled trial/ or clinical trial/ or controlled trial/           | 7962376  |
| 8     | Pragmatic trial/                                                                                             | 721      |
| 9     | (Quasi adj experimental).mp.                                                                                 | 17466    |
| 10    | Cohort studies/                                                                                              | 438040   |
| 11    | (Observational adj (study or studies)).mp.                                                                   | 245170   |
| 12    | Longitudinal study/                                                                                          | 139512   |
| 13    | Cross-sectional study/                                                                                       | 345327   |
| 14    | Retrospective study/                                                                                         | 911739   |
| 15    | Prospective study/                                                                                           | 598500   |
| 16    | (Epidemiolog* adj (study or studies)).mp.                                                                    | 118700   |
| 17    | Case control studies/                                                                                        | 116468   |
| 18    | Case adj2 study or case report/                                                                              | 2908439  |
| 19    | qualitative analysis/ or qualitative research/                                                               | 131936   |
| 20    | 7 or 8 or 9 or 10 or 11 or 12 or 13 or 14 or 15 or 16 or 17 or 18 or 19                                      | 12064177 |
| 21    | ((medic* or drug* or pill* or tablet* or treatment*) adj3 (Discontin* or reduc* or terminat* or taper*)).mp. | 294378   |
| 22    | ((medic* or drug* or pill* or tablet* or treatment*) adj3 (cease or cessation*)).mp.                         | 16411    |
| 23    | ((medic* or drug* or pill* or tablet* or treatment*) adj3 (stop* adj taking)).mp.                            | 851      |

|    |                                                                                                                                                                                                                                                                                                         |         |
|----|---------------------------------------------------------------------------------------------------------------------------------------------------------------------------------------------------------------------------------------------------------------------------------------------------------|---------|
| 24 | ((medic* or drug* or pill* or tablet* or treatment*) adj3 (stop* adj using)).mp.                                                                                                                                                                                                                        | 243     |
| 25 | ((medic* or drug* or pill* or tablet* or treatment*) adj3 (deprescrip* or de-prescrip* or deprescrib* or de-prescrib*)).mp.                                                                                                                                                                             | 448     |
| 26 | 23 or 24 or 25                                                                                                                                                                                                                                                                                          | 1535    |
| 27 | Remove duplicates from 26                                                                                                                                                                                                                                                                               | 1515    |
| 28 | 21 or 22                                                                                                                                                                                                                                                                                                | 309129  |
| 29 | 27 or 28                                                                                                                                                                                                                                                                                                | 310335  |
| 30 | 6 and 20 and 29                                                                                                                                                                                                                                                                                         | 2250    |
| 31 | limit 30 to (human and english language and (adult <18 to 64 years> or aged <65+ years>))                                                                                                                                                                                                               | 1550    |
| 32 | (hospital or outpatient or ambulatory or (residential adj care) or (aged adj care) or pharmacy or emergency).mp. [mp=title, abstract, heading word, drug trade name, original title, device manufacturer, drug manufacturer, device trade name, keyword, floating subheading word, candidate term word] | 2953816 |
| 33 | (smoking or tobacco or nicotine or (smoking adj1 cessation)).mp. [mp=title, abstract, heading word, drug trade name, original title, device manufacturer, drug manufacturer, device trade name, keyword, floating subheading word, candidate term word]                                                 | 587497  |
| 34 | (book or conference or letter or opinion or comment* or editorial or factsheet*).pt.                                                                                                                                                                                                                    | 6300831 |
| 35 | 32 or 33 or 34                                                                                                                                                                                                                                                                                          | 8739730 |
| 36 | 31 not 35                                                                                                                                                                                                                                                                                               | 637     |

| Steps | Search terms – Medline                                                                                                      | Hits    |
|-------|-----------------------------------------------------------------------------------------------------------------------------|---------|
| 1     | Primary health care/ or family practice/ or general practice/                                                               | 136245  |
| 2     | General practitioner.mp.                                                                                                    | 19309   |
| 3     | Primary care professional.ti,ab,kw.                                                                                         | 51      |
| 4     | 1 or 2 or 3                                                                                                                 | 149115  |
| 5     | 543390                                                                                                                      | 543390  |
| 6     | Clinical Trials as Topic/ or Randomized Controlled Trials as Topic/                                                         | 319688  |
| 7     | Pragmatic Clinical Trials as Topic/mt [Methods]                                                                             | 82      |
| 8     | (Quasi adj experimental).mp.                                                                                                | 13017   |
| 9     | (cohort adj (study or studies)).mp.                                                                                         | 389354  |
| 10    | (Observational adj (study or studies)).mp.                                                                                  | 159188  |
| 11    | Longitudinal Studies/mt [Methods]                                                                                           | 176     |
| 12    | Cross-Sectional Studies/mt [Methods]                                                                                        | 215     |
| 13    | Retrospective Studies/mt [Methods]                                                                                          | 11      |
| 14    | Prospective Studies/mt [Methods]                                                                                            | 11      |
| 15    | Epidemiologic Studies/                                                                                                      | 8295    |
| 16    | Case-control studies/                                                                                                       | 282232  |
| 17    | case report/                                                                                                                | 2094945 |
| 18    | (Case adj2 study).mp.                                                                                                       | 177140  |
| 19    | qualitative research/                                                                                                       | 53822   |
| 20    | 5 or 6 or 7 or 8 or 9 or 10 or 11 or 12 or 13 or 14 or 15 or 16 or 17 or 18 or 19                                           | 3832590 |
| 21    | ((medic* or drug* or pill* or tablet* or treatment*) adj3 (Discontin* or reduc* or terminat* or taper*)).mp.                | 144504  |
| 22    | ((medic* or drug* or pill* or tablet* or treatment*) adj3 (cease or cessation*)).mp.                                        | 10858   |
| 23    | ((medic* or drug* or pill* or tablet* or treatment*) adj3 (stop* adj taking)).mp.                                           | 471     |
| 24    | ((medic* or drug* or pill* or tablet* or treatment*) adj3 (stop* adj using)).mp.                                            | 145     |
| 25    | ((medic* or drug* or pill* or tablet* or treatment*) adj3 (deprescrip* or de-prescrip* or deprescrib* or de-prescrib*)).mp. | 285     |

|    |                                                                                                                                                                                                                                                                                                              |         |
|----|--------------------------------------------------------------------------------------------------------------------------------------------------------------------------------------------------------------------------------------------------------------------------------------------------------------|---------|
| 26 | 23 or 24 or 25                                                                                                                                                                                                                                                                                               | 896     |
| 27 | Remove duplicates from 26                                                                                                                                                                                                                                                                                    | 892     |
| 28 | 21 or 22                                                                                                                                                                                                                                                                                                     | 154520  |
| 29 | 27 or 28                                                                                                                                                                                                                                                                                                     | 155239  |
| 30 | 6 and 20 and 29                                                                                                                                                                                                                                                                                              | 516     |
| 31 | limit 30 to (english language and humans and ("all adult (19 plus years)" or "young adult (19 to 24 years)" or "adult (19 to 44 years)" or "young adult and adult (19-24 and 19-44)" or "middle age (45 to 64 years)" or "middle aged (45 plus years)" or "all aged (65 and over)" or "aged (80 and over)")) | 367     |
| 32 | (hospital or outpatient or ambulatory or (residential adj care) or (aged adj care) or pharmacy or emergency).mp.                                                                                                                                                                                             | 1640940 |
| 33 | (smoking or tobacco or nicotine or (smoking adj1 cessation)).mp. [mp=title, abstract, heading word, drug trade name, original title, device manufacturer, drug manufacturer, device trade name, keyword, floating subheading word, candidate term word]                                                      | 363328  |
| 34 | (book or conference or letter or opinion or comment* or editorial or factsheet*).pt.                                                                                                                                                                                                                         | 1837575 |
| 35 | 32 or 33 or 34                                                                                                                                                                                                                                                                                               | 3746464 |
| 36 | 31 not 35                                                                                                                                                                                                                                                                                                    | 228     |

| Steps | Search terms – CINAHL                                                                                                                                                                                                                                                                                                                                                                                                                                                                                                                                                                                                                                                                                                                                                                                                                               |           |
|-------|-----------------------------------------------------------------------------------------------------------------------------------------------------------------------------------------------------------------------------------------------------------------------------------------------------------------------------------------------------------------------------------------------------------------------------------------------------------------------------------------------------------------------------------------------------------------------------------------------------------------------------------------------------------------------------------------------------------------------------------------------------------------------------------------------------------------------------------------------------|-----------|
| S1    | Deprescribe or deprescribing or 'reducing medicines' or deprescription                                                                                                                                                                                                                                                                                                                                                                                                                                                                                                                                                                                                                                                                                                                                                                              | 728       |
| S2    | discontinuation OR discontinue OR discontinued                                                                                                                                                                                                                                                                                                                                                                                                                                                                                                                                                                                                                                                                                                                                                                                                      | 22,817    |
| S3    | (MH "Reducing Agents") OR reduction of OR reducing OR reduce OR reduced OR reduction                                                                                                                                                                                                                                                                                                                                                                                                                                                                                                                                                                                                                                                                                                                                                                | 601,471   |
| S4    | (MH "Treatment Termination") OR ( terminate or termination )                                                                                                                                                                                                                                                                                                                                                                                                                                                                                                                                                                                                                                                                                                                                                                                        | 16,321    |
| S5    | tapering OR taper                                                                                                                                                                                                                                                                                                                                                                                                                                                                                                                                                                                                                                                                                                                                                                                                                                   | 2,369     |
| S6    | cessation OR cease                                                                                                                                                                                                                                                                                                                                                                                                                                                                                                                                                                                                                                                                                                                                                                                                                                  | 37,820    |
| S7    | stop* n1 us* OR stop* n1 tak*                                                                                                                                                                                                                                                                                                                                                                                                                                                                                                                                                                                                                                                                                                                                                                                                                       | 1,924     |
| S8    | medication* OR medicine* OR drug* OR pill* OR tablet* OR treatment*                                                                                                                                                                                                                                                                                                                                                                                                                                                                                                                                                                                                                                                                                                                                                                                 | 1,957,097 |
| S9    | (MH "Primary Health Care") or (MH "Physicians, Family") or (MH "Family Practice")                                                                                                                                                                                                                                                                                                                                                                                                                                                                                                                                                                                                                                                                                                                                                                   | 101,934   |
| S10   | (MH "Randomized Controlled Trials") OR (MH "Crossover Design") OR (MH "Empirical Research") OR (MH "Experimental Studies") OR (MH "Community Trials") OR (MH "Controlled Before-After Studies") OR (MH "Double-Blind Studies") OR (MH "Factorial Design") OR (MH "Historically Controlled Study") OR (MH "Nonrandomized Trials") OR (MH "One-Shot Case Study") OR (MH "Pretest-Posttest Design") OR (MH "Pretest-Posttest Control Group Design") OR (MH "Single-Blind Studies") OR (MH "Case Control Studies") OR (MH "Population-Based Case Control") OR (MH "Matched Case Control") OR (MH "Correlational Studies") OR (MH "Cross Sectional Studies") OR (MH "Triple-Blind Studies") OR (MH "Qualitative Studies") OR (MH "Quantitative Studies") OR (MH "Quasi-Experimental Studies") OR (MH "Retrospective Design") OR (MH "Repeated Measures") | 964,575   |
| S11   | (MH "Survey Research") OR (MH "Physiological Studies") OR (MH "Pilot Studies") OR (MH "Exploratory Research") OR (MH "Formative Evaluation Research") OR (MH "Summative Evaluation Research") OR (MH "Descriptive Research") OR (MH "Case Studies") OR (MH "Behavioral Research")                                                                                                                                                                                                                                                                                                                                                                                                                                                                                                                                                                   | 254,970   |
| S12   | S1 OR S2 OR S3 OR S4 OR S5 OR S6 OR S7                                                                                                                                                                                                                                                                                                                                                                                                                                                                                                                                                                                                                                                                                                                                                                                                              | 665,101   |
| S13   | S10 OR S11                                                                                                                                                                                                                                                                                                                                                                                                                                                                                                                                                                                                                                                                                                                                                                                                                                          | 1,106,257 |
| S14   | S8 N3 S12                                                                                                                                                                                                                                                                                                                                                                                                                                                                                                                                                                                                                                                                                                                                                                                                                                           | 313,689   |
| S15   | (S8 n3 S12) AND (S9 AND S13 AND S14) Limiters - English Language; Human; Age Groups: Adult: 19-44 years, Middle Aged: 45-64 years, Aged: 65+ years, Aged, 80 and over, All Adult                                                                                                                                                                                                                                                                                                                                                                                                                                                                                                                                                                                                                                                                    | 1,027     |
| S16   | (MH "Hospitals") OR (MH "Hospital Units") OR (MH "Poison Control Centers") OR (MH "Laboratories") OR (MH "Tissue Banks") OR (MH "Intensive Care Units") OR (MH "Delivery Rooms") OR (MH "Intensive Care Units, Pediatric") OR (MH "Nurseries, Hospital") OR (MH "Operating Rooms") OR (MH "Libraries,                                                                                                                                                                                                                                                                                                                                                                                                                                                                                                                                               | 149,781   |

|     |                                                                                                                                                                                                                                                                                                                                                                                               |         |
|-----|-----------------------------------------------------------------------------------------------------------------------------------------------------------------------------------------------------------------------------------------------------------------------------------------------------------------------------------------------------------------------------------------------|---------|
|     | Hospital") OR (MH "Food Service Department") OR (MH "Engineering and Maintenance Department") OR (MH "GI Laboratories") OR (MH "Health Information Management Service") OR (MH "Housekeeping Department") OR (MH "Information Systems Department") OR (MH "Intravenous Therapy Department") OR (MH "Laundry Department") OR (MH "Clinical Laboratories") OR (MH "Ambulatory Care Facilities") |         |
| S17 | (MH "Smoking Cessation") OR (MH "Smoking") OR (MH "Smoking Cessation Assistance (Iowa NIC)") OR (MH "Smoking Cessation Programs")                                                                                                                                                                                                                                                             | 77,210  |
| S18 | editorial OR book OR conference OR letter OR opinion OR comment* OR factsheet*                                                                                                                                                                                                                                                                                                                | 465,382 |
| S19 | S16 OR S17 OR S18                                                                                                                                                                                                                                                                                                                                                                             | 682,220 |
| S20 | S15 not s19                                                                                                                                                                                                                                                                                                                                                                                   | 872     |
| S21 | Source types = academic journals (853), dissertations (4)                                                                                                                                                                                                                                                                                                                                     | 857     |

| Steps | Search terms – ANZCTR                          |     |
|-------|------------------------------------------------|-----|
| 1     | Deprescribe general practice (basic search)    | 5   |
| 2     | deprescribe primary care (basic search)        | 5   |
| 3     | Deprescription general practice (basic search) | 0   |
| 4     | Deprescription primary care (basic search)     | 0   |
| 5     | Taper general practice (basic search)          | 7   |
| 6     | Taper primary care (basic search)              | 6   |
| 7     | Cease general practice (basic search)          | 7   |
| 8     | Cease primary care (basic search)              | 18  |
| 9     | Cessation general practice (basic search)      | 26  |
| 10    | Cessation primary care (basic search)          | 42  |
| 11    | Withdrawal general practice (basic search)     | 10  |
| 12    | Withdrawal primary care (basic search)         | 36  |
| 13    | Termination general practice (basic search)    | 1   |
| 14    | Termination primary care (basic search)        | 4   |
| 15    | Reduce general practice (basic search)         | 165 |
| 16    | Reduce primary care (basic search)             | 473 |
| 17    | Discontinue general practice (basic search)    | 6   |
| 18    | Discontinue primary care (basic search)        | 11  |
|       | Total                                          | 822 |

| Steps | Search terms – Clinicaltrials.gov                                                                                                                        |     |
|-------|----------------------------------------------------------------------------------------------------------------------------------------------------------|-----|
| 1     | Intervention: Deprescribe, Location terms: general practice,                                                                                             | 3   |
| 2     | Deprescribe, deprescribing (Condition or disease) primary care, primary health care (auto synonyms search) (other terms)                                 | 14  |
| 3     | Deprescription general practice, family practice, family medicine, general medicine, medicine general                                                    | 0   |
| 4     | Deprescription (Condition or disease) primary care, primary health care (auto synonyms search) (other terms)                                             | 0   |
| 5     | Taper, tapering, general practice (basic search)                                                                                                         | 0   |
| 6     | Taper, tapering (Condition or disease) primary care, primary health care (auto synonyms search) (other terms)                                            | 14  |
| 7     | Cease, stops, quit, general practice (basic search)                                                                                                      | 13  |
| 8     | Cease, stops, quit (Condition or disease) primary care, primary health care (auto synonyms search) (other terms)                                         | 20  |
| 9     | Cessation general practice (basic search)                                                                                                                | 63  |
| 10    | Cessation (Condition or disease) primary care, physician, primary health care (auto synonyms search) (other terms)                                       | 45  |
| 11    | Withdrawal, retired, withdraw, withdrawn general practice (basic search)                                                                                 | 14  |
| 12    | Withdrawal (Condition or disease) primary care, primary health care (auto synonyms search) (other terms)                                                 | 52  |
| 13    | Termination general practice (basic search)                                                                                                              | 2   |
| 14    | Termination (Condition or disease) primary care, primary health care (auto synonyms search) (other terms)                                                | 9   |
| 15    | Reduce general practice (basic search)                                                                                                                   | 95  |
| 16    | Reduce (Condition or disease) primary care, physician, primary health care (auto synonyms search) (other terms)                                          | 102 |
| 17    | Discontinue general practice (basic search)                                                                                                              | 9   |
| 18    | Discontinue, discontinuations, discontinued, discontinuous (Condition or disease) primary care, primary health care (auto synonyms search) (other terms) | 7   |
|       | Total                                                                                                                                                    | 462 |



| Steps | Search terms – OpenGrey                                                                                                                                          |    |
|-------|------------------------------------------------------------------------------------------------------------------------------------------------------------------|----|
| 1     | (reduce OR reduction OR terminat* OR deprescri* OR withdraw* OR discontinu* OR ceas* OR cessation OR stop*) AND ("general practice" OR "primary care") lang:"en" | 61 |

**Handsearch of journals**

| Steps | Search terms – ISRCTN registry                        |     |
|-------|-------------------------------------------------------|-----|
| 1     | Deprescribe (interventions) “general practice” (text) | 0   |
| 2     | deprescribe “primary care”                            | 0   |
| 3     | Deprescription “general practice”                     | 0   |
| 4     | Deprescription “primary care”                         | 0   |
| 5     | Taper “general practice”                              | 2   |
| 6     | Taper “primary care”                                  | 5   |
| 7     | Cease “general practice”                              | 1   |
| 8     | Cease “primary care”                                  | 6   |
| 9     | Cessation “general practice”                          | 15  |
| 10    | Cessation “primary care”                              | 38  |
| 11    | Withdrawal “general practice”                         | 3   |
| 12    | Withdrawal “primary care”                             | 23  |
| 13    | Termination “general practice”                        | 2   |
| 14    | Termination “primary care”                            | 3   |
| 15    | Reduce “general practice”                             | 41  |
| 16    | Reduce “primary care”                                 | 115 |
| 17    | Discontinue “general practice”                        | 5   |
| 18    | Discontinue “primary care”                            | 13  |
|       | Total                                                 | 272 |

| Steps | Search terms – Annals of family medicine 25.5.20                      |     |
|-------|-----------------------------------------------------------------------|-----|
| 1     | Deprescribing, deprescribed, deprescribe, deprescription. ti,ab       | 11  |
| 2     | Medication or medicine or withdraw or withdrawal. ti,ab               | 19  |
| 3     | Medication withdrawn. ti,ab                                           | 4   |
| 4     | Drug withdraw or withdrawal. ti,ab                                    | 21  |
| 5     | Medication or medicine and taper. ti,ab                               | 2   |
| 6     | Drug taper. ti,ab                                                     | 2   |
| 7     | Medication and discontinuation or discontinue or discontinuing. ti,ab | 11  |
| 8     | Medication discontinue. ti,ab                                         | 6   |
| 9     | Medication cessation. ti,ab                                           | 33  |
| 10    | Medication or medicine and termination or terminate. ti,ab            | 8   |
| 11    | Medication reduction. Ti,ab                                           | 151 |
|       | Total                                                                 | 268 |

| Steps | Search terms – BMC Family Practice 25.5.20 |     |
|-------|--------------------------------------------|-----|
| 1     | Deprescribing, deprecise, deprecise. kw    | 12  |
| 2     | Medication withdraw*. kw                   | 150 |
| 3     | Drug withdraw*. kw                         | 113 |
| 4     | Medication taper*.kw                       | 18  |
| 5     | Drug taper. kw                             | 16  |
| 6     | Medication discontinu*. kw                 | 126 |
| 7     | Medication cessation. kw                   | 123 |
| 8     | Medication terminat*. kw                   | 33  |
| 9     | Medication reduction. kw                   | 363 |
|       | Total                                      | 962 |

| Steps | Search terms – Family Practice       |     |
|-------|--------------------------------------|-----|
| 1     | Deprescribing, deprecise, deprecise. | 9   |
| 2     | Withdrawal. ti                       | 5   |
| 3     | Medication taper                     | 17  |
| 4     | Medication discontinuation           | 184 |
| 5     | Medication cessation. ti             | 0   |
| 6     | Termination. ti                      | 0   |
| 7     | Reduction. ti                        | 10  |
|       | Total                                | 225 |

| Steps | Search terms – British Journal of General Practice              |     |
|-------|-----------------------------------------------------------------|-----|
| 1     | Deprescribing, deprescribed, deprescribe, deprescription. ti,ab | 16  |
| 2     | Medication withdrawal. ti                                       | 55  |
| 3     | Medication taper. ti                                            | 52  |
| 4     | Medication discontinuation. ti                                  | 55  |
| 5     | Medication cessation. ti                                        | 75  |
| 6     | Medication termination. ti                                      | 60  |
|       | Total                                                           | 313 |

**Appendix B: Table of study characteristics**

| Study details                       | Study design                          | Participants                                                                                                                       | Primary outcome/s                                                                                                                 | Medication to be deprescribed                              | Intervention elements                                                                                                                                                                                                                                                                                                                                                                                                                         | Comparison                                                       |
|-------------------------------------|---------------------------------------|------------------------------------------------------------------------------------------------------------------------------------|-----------------------------------------------------------------------------------------------------------------------------------|------------------------------------------------------------|-----------------------------------------------------------------------------------------------------------------------------------------------------------------------------------------------------------------------------------------------------------------------------------------------------------------------------------------------------------------------------------------------------------------------------------------------|------------------------------------------------------------------|
| Anderson et al. (2019), Australia   | Controlled pre-post                   | 20 GPs and 145 patients aged 65+ years with polypharmacy (Int <i>n</i> = 78, Con <i>n</i> = 67)                                    | No. of agreed regular medications deprescribed                                                                                    | Polypharmacy (5+regularly prescribed medications)          | Training workshop for GPs. Deprescribing consultation between GP and patient for medication review. Additional support for medication review by pharmacist at GPs discretion.                                                                                                                                                                                                                                                                 | Usual care                                                       |
| Bashir et al. (1994), UK            | Controlled evaluation                 | 109 adult patients who were chronic BZD users (Int <i>n</i> = 51, Con <i>n</i> = 58)                                               | Psychiatric disorder (GHQ-12), BZD withdrawal symptoms (benzodiazepine withdrawal questionnaire)                                  | BZD                                                        | GP advises patient about risks of BZD, reducing and stopping BZD and provides self-help booklet (contains advice on stopping).                                                                                                                                                                                                                                                                                                                | No intervention                                                  |
| Bayliss et al. (2020), USA          | Protocol for a cluster RCT            | Target of 4800 patients aged 65+ years with polypharmacy and Alzheimer's, MCI or dementia                                          | No. of chronic medications, no. of PIMs.                                                                                          | Polypharmacy (5+ chronic medications)                      | Patients: Informational brochure (about discontinuing PIMs, benefits of taking fewer medicines and the rPATDcog) mailed to patients. Encouraged to visit GP to discuss discontinuation.<br>Clinicians: educational presentation about deprescribing, complete PPMD assessment, 12 tip sheets with suggested language and approaches for discontinuation, notification in electronic appointment schedule that patient has been sent brochure. | Usual care (waitlist control)                                    |
| Campbell et al. (1999), New Zealand | RCT                                   | 93 patients aged 65+ years taking psychotropics (Int 1 <i>n</i> = 24, Int 2 <i>n</i> = 24, Int 3 <i>n</i> = 21, Con <i>n</i> = 24) | No. of falls                                                                                                                      | BZD, hypnotics, antidepressants or tranquiliser medication | Intervention 1: gradual withdrawal plus a home-based exercise program.<br>Intervention 2: gradual withdrawal only.<br>Intervention 3: home-based exercise program only.                                                                                                                                                                                                                                                                       | Usual care                                                       |
| Campbell. (2020), USA               | Protocol registration for Cluster RCT | Target of 344 older adult patients with cognitive decline                                                                          | Change in Cognitive Composite Score                                                                                               | Anticholinergics                                           | Pharmacist based intervention which involves shared decision making between pharmacist, physician and patient to personalise deprescribing (tapering and/or alternative treatment).                                                                                                                                                                                                                                                           | Usual care + information re: risks of polypharmacy sent via post |
| Campins et al. (2016), Spain        | RCT                                   | 503 patients aged 70+ years with polypharmacy (Int <i>n</i> = 252, Con <i>n</i> = 246)                                             | No. of recommendations and changes implemented, prescribed drugs, restarted drugs, primary care and ED hospitalisations and death | Polypharmacy (8+ medications)                              | Medication review by clinical pharmacist using an algorithm. Discussion between pharmacist and physician about recommendation from the review to create final set of recommendations. Recommendations then discussed with patient with final agreement for changes made between patient and physician.                                                                                                                                        | Usual care                                                       |

| Study details                      | Study design                            | Participants                                                                                                                                          | Primary outcome/s                                                                              | Medication to be deprescribed                                       | Intervention elements                                                                                                                                                                                                                                                                                                                    | Comparison                                             |
|------------------------------------|-----------------------------------------|-------------------------------------------------------------------------------------------------------------------------------------------------------|------------------------------------------------------------------------------------------------|---------------------------------------------------------------------|------------------------------------------------------------------------------------------------------------------------------------------------------------------------------------------------------------------------------------------------------------------------------------------------------------------------------------------|--------------------------------------------------------|
| Clyne et al. (2015), Ireland       | Cluster RCT                             | 196 patients aged 70 years being prescribed a PIM (Int <i>n</i> = 99, Con <i>n</i> = 97)                                                              | Proportion of patients with PIM drugs, mean number of PIM drugs per group                      | Various (prescribed 1+ potentially inappropriate drugs on a repeat) | GPs: academic detailing session with a pharmacist. Patients: medication review with web-based algorithms for identification and treatment options.                                                                                                                                                                                       | Usual care with simple list summarising PIM            |
| Cormack et al. (1994). UK          | RCT                                     | 209 patients aged between 34 and 102 years taking benzodiazepines for at least 6 months (Int 1 <i>n</i> = 65, Int 2 <i>n</i> = 75, Con <i>n</i> = 69) | Benzodiazepine consumption                                                                     | BZD                                                                 | Intervention 1: Letter from GP asking patients to try reducing or stopping medication. Intervention 2: Letter from GP asking patients to try reducing or stopping medication and four information sheets giving advice about reducing medication, sent at monthly intervals.                                                             | No intervention                                        |
| Cossette et al. (2019), Canada     | Implementation pilot study              | 65 patients aged 65+ years taking PIM                                                                                                                 | No. of patients with a change in at least 1 medication, no. of changed medications per patient | Various                                                             | Computer alerts for selected PIMs in patients' medical records. Pharmacist reviewed alerts and developed and provided patients physician with a treatment plan.                                                                                                                                                                          | N/A                                                    |
| Fernandez-Liz et al. (2018). Spain | Controlled before and after trial       | 1932 patients aged 18 years and older with a mirabegron prescription for overactive bladder                                                           | Medication discontinuation (percentage of change from baseline to 12 month follow-up)          | Mirabegron                                                          | Information and training for healthcare professionals, distributed to all GPs. A structured strategy for medication management (medication review and prioritising). Monthly intervention monitoring (feedback to all GPs).                                                                                                              | No intervention                                        |
| Fournier et al. (2020). France     | Protocol registration for a Cluster RCT | Target of 34000 patients taking PPIs and their GPs                                                                                                    | Proportion of patients achieving 50% decrease in PPI medication                                | PIM                                                                 | GP and patient receive information related to PPI deprescribing. GP receives an algorithm related to PPI deprescribing via letter.                                                                                                                                                                                                       | No intervention                                        |
| Fried et al. (2017). USA           | RCT                                     | 128 veterans aged 65 years and older with polypharmacy (Int <i>n</i> = 64, Con <i>n</i> = 64)                                                         | Patient assessment of shared decision making and clinician -patient communication              | Polypharmacy (7+ medications)                                       | Two web applications which gather medications data and evaluates medication appropriateness. Uses algorithms embedded in the web applications. Generates a report with recommendations regarding medications.                                                                                                                            | Usual care and usual care plus telephone assessment    |
| Giblin et al. (1983). UK           | Non-randomised intervention             | 20 elderly patients with sleep issues (Int <i>n</i> = 10, Con <i>n</i> = 10)                                                                          | Number of nights tablets taken                                                                 | BZD and other hypnotics                                             | All patients (including control) told to stop taking medication. 4 sessions with HCP. Relaxation technique taught in first session and practised at subsequent sessions. Written information about sleep issues was discussed in sessions. General advice regarding withdrawal effects and keeping a positive attitude during cessation. | Told to stop taking medication. No other intervention. |

| Study details                      | Study design                         | Participants                                                                                                                | Primary outcome/s                                                                                                                                                                                                                                     | Medication to be deprescribed                          | Intervention elements                                                                                                                                                                                                                                                                                                                                                                                                                                                                                                   | Comparison                                                                                                                               |
|------------------------------------|--------------------------------------|-----------------------------------------------------------------------------------------------------------------------------|-------------------------------------------------------------------------------------------------------------------------------------------------------------------------------------------------------------------------------------------------------|--------------------------------------------------------|-------------------------------------------------------------------------------------------------------------------------------------------------------------------------------------------------------------------------------------------------------------------------------------------------------------------------------------------------------------------------------------------------------------------------------------------------------------------------------------------------------------------------|------------------------------------------------------------------------------------------------------------------------------------------|
| Gorgels et al. (2005). Netherlands | Prospective controlled intervention  | 2425 patients with anxiety and/or insomnia taking long-term BZD (3+ months) (Int n = 1707, Con n = 1821)                    | No. of prescribed daily dosages (PDD) and the percentage of subjects without prescription (quitters)                                                                                                                                                  | BZD                                                    | Letter sent to patient from GP, containing advice to gradually discontinue BZD use, followed by a written invitation to arrange an appointment with the GP 3 months later, to evaluate actual BZD use.                                                                                                                                                                                                                                                                                                                  | Usual care                                                                                                                               |
| Griever et al.                     | Protocol for a pragmatic cluster-RCT | Target of 32 practices                                                                                                      | Change in PIM prevalence                                                                                                                                                                                                                              | Potentially inappropriate medication (10+ medications) | Implementation strategies to optimise practice management of patients with complex care needs. Involves primary care practice teams, policy-makers and patient partners forming a collaborative group who will participate in learning sessions. GPs and staff will be provided with audit and feedback information on their patients. Practices form a collaborative where GPs receive education via workshops.                                                                                                        | Usual care                                                                                                                               |
| Heather et al. (2004). UK          | RCT                                  | 284 patients with long-term (6+ months) BZD use (Int 1 n = 98, Int 2 n = 93, Con n = 93)                                    | Change in BZD intake before and after the intervention (6 months)                                                                                                                                                                                     | BZD                                                    | Intervention 1: patients sent a letter inviting them to see their GP for a medication review. Patients given written guidelines which included benefits of reducing medication and a timetable for withdrawal, a self-help booklet (regarding stopping) and a leaflet about sleeping problems.<br>Intervention 2: patients sent a letter asking them to consider cutting down on or stopping medication.                                                                                                                | Usual care                                                                                                                               |
| Holliday et al. (2017). Australia  | Before and after study               | 58 GP registrars                                                                                                            | Reduction of opioid prescribing and change in proportion of hypothetical opioid management responses on two clinical vignettes                                                                                                                        | Opioids                                                | 90-minute face-to-face educational session as part of a day-long educational workshop. Attendees given selected papers as prereading as well as post-workshop resources on pain management strategies.                                                                                                                                                                                                                                                                                                                  | N/A                                                                                                                                      |
| Jager et al. (2017). Germany       | Cluster-RCT                          | 21 GPs (Int n = 10, Con n = 11) and 273 patients aged 50 years and older with 3 chronic diseases (Int n = 143, Con n = 130) | Change in the degree to which the 3 recommendations (a) structured medication counselling, (b) the use of medication lists, and (c) structured medication reviews to reduce potentially inappropriate medication) have been implemented into practice | Potentially inappropriate medication (4+ medications)  | 4-hour workshop for practice teams, GPs and medical assistants. Medical assistants trained to complete brown bag reviews. GPs trained in using online resources and a checklist for medication review. After workshop, GPs organised a team meeting to discuss how to implement the recommendations. Posters encouraging patients to bring their medication list with them were placed in clinics. Patients received reminders to bring medication to appointments and an information tool was loaded onto a PC tablet. | GPs in control group were informed about general aim of study. GPs were aware of patients in need for intensified care in their practice |



| Study details                    | Study design                    | Participants                                                                                                                            | Primary outcome/s                                                                                      | Medication to be deprescribed                             | Intervention elements                                                                                                                                                                                                                                                                                                                                                                                                                                                                                                                                                                                                                                                    | Comparison                                                                                                                                                                                                                                                      |
|----------------------------------|---------------------------------|-----------------------------------------------------------------------------------------------------------------------------------------|--------------------------------------------------------------------------------------------------------|-----------------------------------------------------------|--------------------------------------------------------------------------------------------------------------------------------------------------------------------------------------------------------------------------------------------------------------------------------------------------------------------------------------------------------------------------------------------------------------------------------------------------------------------------------------------------------------------------------------------------------------------------------------------------------------------------------------------------------------------------|-----------------------------------------------------------------------------------------------------------------------------------------------------------------------------------------------------------------------------------------------------------------|
| Johnson et al. (2012). Scotland  | Cohort study (prospective)      | 2691 patients aged 18 years and older being prescribed the same antidepressant for $\geq 2$ years                                       | Changes in Defined Daily Doses                                                                         | Antidepressants (Selective Serotonin Reuptake Inhibitors) | A specifically designed data extraction tool identified patients prescribed an antidepressant. GPs used a standardised review form to conduct a medication review.                                                                                                                                                                                                                                                                                                                                                                                                                                                                                                       | N/A                                                                                                                                                                                                                                                             |
| Jungo et al. (2019). Switzerland | Protocol for a Cluster-RCT      | Targeted of 320 patients aged 65 years and older with multimorbidity and polypharmacy                                                   | Medication appropriateness (under-prescribing, over-prescribing, drug interactions)                    | Polypharmacy (5+ medications)                             | Intervention group GPs watch an instruction video and read training material. GPs conduct a systematic medication review (which includes the use of a web-based clinical decision support system (CDSS)). The CDSS uses algorithms to generate recommendations for the GP about patient's medication which is aimed at allowing patients and GPs to engage in a shared-decision making process about the patient's medication intake.                                                                                                                                                                                                                                    | Sham intervention consisting of a medication discussion (in accordance with usual care) between patient and GP                                                                                                                                                  |
| Kendrick et al. (2019). UK       | Protocol registration for a RCT | Target of 402 patients aged 18 years and older who are not depressed, anxious or under psychiatric care                                 | Depressive symptoms at 6 month follow-up                                                               | Antidepressants                                           | Practitioner intervention consists of online education and information modules with printable resources. Patient intervention consists of online education and information modules. Modules include tapering regimens and information on reducing medications, dealing with relapse and withdrawal symptoms, keeping well, overcoming fear of stopping, and values and goal setting. Practices in intervention arm given access to online education and information and an induction to the study either face-to-face or online. Patients will meet with GP or practice nurse on an "as needed" basis. Telephone support will be provided by a psychologist to patients. | Control arm practices will be informed that patients are potentially eligible for antidepressant tapering and their medical records will be flagged. Patients asked to make an appointment as part of usual care to see their GP or practice nurse for a review |
| Krol et al. (2014). Netherlands  | Cluster RCT                     | 20 GPs and 113 of their patients aged 18 years and older prescribed PPIs for gastro-oesophageal reflux disease (Int n = 59, Con n = 50) | No. of patients who had stopped or reduced PPI prescription dose at 12 and 20 weeks after intervention | PPIs                                                      | Information leaflet about updated recommendations about the clinical management of dyspepsia and reducing PIM was sent to patients from intervention group GPs. Patients chose whether or not make an appointment with their GP. GPs received brief education on updated guidelines for clinical management of dyspepsia from one of the research team.                                                                                                                                                                                                                                                                                                                  | Usual care                                                                                                                                                                                                                                                      |

| Study details             | Study design                    | Participants                                                                                                                                                              | Primary outcome/s                                                                                                     | Medication to be deprescribed                               | Intervention elements                                                                                                                                                                                                                                                                                                                                                                                                                                                                                                                                                                                                                                                                                                   | Comparison                                                                                                                                                                                                                                                                                                                                                                             |
|---------------------------|---------------------------------|---------------------------------------------------------------------------------------------------------------------------------------------------------------------------|-----------------------------------------------------------------------------------------------------------------------|-------------------------------------------------------------|-------------------------------------------------------------------------------------------------------------------------------------------------------------------------------------------------------------------------------------------------------------------------------------------------------------------------------------------------------------------------------------------------------------------------------------------------------------------------------------------------------------------------------------------------------------------------------------------------------------------------------------------------------------------------------------------------------------------------|----------------------------------------------------------------------------------------------------------------------------------------------------------------------------------------------------------------------------------------------------------------------------------------------------------------------------------------------------------------------------------------|
| Kuyken et al. (2015). UK  | RCT                             | 424 patients aged 18 years and older and in full or partial remission from major depressive disorder (Int n = 212, Con n = 212)                                           | Time from randomisation to relapse/recurrence                                                                         | Antidepressants                                             | Mindfulness-based Cognitive Therapy (MBCT) groups delivered by therapists. Involved 8 x 2.25-hour group sessions over consecutive weeks, with up to four refresher sessions held in the year following the end of the 8 core sessions. Participants encouraged to taper and discontinue antidepressant medication. GPs and participant given guideline information about typical tapering/discontinuation. Approximately halfway through MBCT sessions, GPs received letters from research team and trial GP prompting them to discuss tapering regime. Another letter was sent at the completion of the 8 sessions to ensure a tapering regime was in place. Patients also received letters encouraging them to taper. | Doctors asked to meet with patient regularly to review medication. Patients were encouraged to adhere to medication for the full length of the trial by sending them letters signed by the chief investigator and their GP after each follow-up. Patients told that the trial was seeking to compare staying on ADM for 2 years w, taking part in mindfulness classes and stopping ADM |
| Linsky et al. (2020). USA | Protocol registration for a RCT | Target of 6800 Veterans taking one of the following target medications: gabapentin, Insulin, Sulfonylurea, PPIs                                                           | Deprescribing vs not (non-refill in the 6 months following primary care appointment or reduction in total daily dose) | PIM (specifically: Gabapentin, Insulin, Sulfonylurea, PPIs) | Patients sent a medication brochure designed to educate and activate patients to deprescribe PIM by consulting their healthcare provider.                                                                                                                                                                                                                                                                                                                                                                                                                                                                                                                                                                               | Not specified                                                                                                                                                                                                                                                                                                                                                                          |
| Llor et al. (2017). Spain | Protocol for a RCT              | Target of 480 patients aged between 18 to 75 years with uncomplicated acute respiratory tract infections who had taken antibiotics for <3 days (Int n = 240, Con n = 240) | Duration of severe symptoms                                                                                           | Antibiotics                                                 | Discontinuation of antibiotic medication. Patients in the intervention arm were informed of the treatment arm that they had been randomised to and were informed as to what actions to take if symptoms worsened or there was no improvement. Patients were scheduled to attend a baseline visit and subsequent visits at day 2-3, day 14-28 and day 90 for monitoring.                                                                                                                                                                                                                                                                                                                                                 | Continued antibiotic treatment                                                                                                                                                                                                                                                                                                                                                         |

| Study details                     | Study design                                                           | Participants                                                                                                                                                                      | Primary outcome/s                                                                                                                                                | Medication to be deprescribed                     | Intervention elements                                                                                                                                                                                                                                                                                                                                                                               | Comparison                                                                                                                           |
|-----------------------------------|------------------------------------------------------------------------|-----------------------------------------------------------------------------------------------------------------------------------------------------------------------------------|------------------------------------------------------------------------------------------------------------------------------------------------------------------|---------------------------------------------------|-----------------------------------------------------------------------------------------------------------------------------------------------------------------------------------------------------------------------------------------------------------------------------------------------------------------------------------------------------------------------------------------------------|--------------------------------------------------------------------------------------------------------------------------------------|
| Luymes et al. (2018). Netherlands | Cluster RCT                                                            | 1067 patients aged between 40 years and 70 years without established CVD, using PIM (Intention to treat int $n = 492$ , Per-protocol intervention int $n = 319$ , Con $n = 575$ ) | Difference in the increase in predicted (10-year) CVD risk in the per-protocol (PP) population                                                                   | Antihypertensive and/or lipid-lowering drugs      | GPs and practice nurses received a 2-hour workshop on the intervention. Patients attended clinic where the nurse advised them to discuss deprescribing their preventive cardiovascular medication with their GP. GPs followed a predefined deprescribing guideline and were advised to follow the recommendations of the Dutch guideline for cardiovascular risk for (re-)initiation of medication. | Usual care                                                                                                                           |
| Magin et al. (2018a). Australia   | Protocol registration for an observational cohort and evaluation study | Target of 624 Australian GP registrars in terms 1 and 2 of their vocational training program                                                                                      | Frequency of benzodiazepine prescription                                                                                                                         | BZD and related drugs                             | GP registrars receive 1. Pre- and post- workshop educational resources (journal articles) provided by email; 2. 40-minute face-to-face group session with an educational presentation; 3. 1-hour webinar for supervisors; 4. Registrar-supervisor dyad case-based discussions.                                                                                                                      | Usual educational which will include some education in benzodiazepine use                                                            |
| Magin et al. (2018b). Australia   | Protocol registration for an observational cohort and evaluation study | Target of 624 Australian GP registrars in terms 1 and 2 of their vocational training program                                                                                      | Change in the no. of medicines deprescribed per 100 consultations with patients aged 65 years or older and change in no. of medicines from established PIM lists | PIM and polypharmacy (no. of drugs not specified) | GP registrars receive 1. Pre- and post- workshop educational resources (journal articles) provided by email; 2. 40-minute face-to-face group session with an educational presentation; 3. 1-hour webinar for supervisors; 4. Registrar-supervisor dyad case-based discussions.                                                                                                                      | Usual educational which will include some education in deprescribing medicines in older patients                                     |
| Mangin et al. (2008). New Zealand | Protocol registration for a RCT                                        | Target of 330 patients aged between 18 to 75 years with depression and taking ADM for at least 12 months                                                                          | Depression recurrence                                                                                                                                            | Antidepressants                                   | Placebo masked tapered cessation. Medication will be tapered over a month to placebo which will continue for 18 months. Dose of active drug in each capsule will be halved each week for the first four weeks then discontinued.                                                                                                                                                                    | Continuation of maintenance ADM treatment. Medication will be encapsulated as a powder which look identical to the taper/placebo arm |

| Study details                       | Study design                                                                                  | Participants                                                                                            | Primary outcome/s                                                                        | Medication to be deprescribed                    | Intervention elements                                                                                                                                                                                                                                                                                                                                                                                                                                                                                                                                                                  | Comparison |
|-------------------------------------|-----------------------------------------------------------------------------------------------|---------------------------------------------------------------------------------------------------------|------------------------------------------------------------------------------------------|--------------------------------------------------|----------------------------------------------------------------------------------------------------------------------------------------------------------------------------------------------------------------------------------------------------------------------------------------------------------------------------------------------------------------------------------------------------------------------------------------------------------------------------------------------------------------------------------------------------------------------------------------|------------|
| McCarthy et al. (2017). Ireland     | Protocol for a cluster RCT                                                                    | Target of 30 GP practices and 450 patients aged 65 years and older with multimorbidity and polypharmacy | Proportion of patients with any PIM and mean no. of repeat medications                   | Polypharmacy (15+ repeat medications)            | GPs receive: 1. Training videos for performing a medication review, describing the evidence on polypharmacy, common PIM in older people, multimorbidity and treatment burden and guidance on establishing treatment burden and supporting patients to express their priorities; 3. An online medication review template. Medication changes at the discretion of the prescribing GP.                                                                                                                                                                                                   | Usual care |
| Mercier-Guyon et al. (2004). France | RCT                                                                                           | 81 patients aged between 25 to 55 years taking BZD for the treatment of an anxiety disorder             | Extent of withdrawal symptoms over the treatment period (6 weeks)                        | BZD                                              | Patients given captodiamine (3 x 50mg tablets per day), a sedative and anxiolytic. In the following 2 weeks, each participant was individually weaned from BZD treatment. Each participant was instructed to reduce BZD consumption to nothing within this time with a proposed regimen of half the dose in the first week, followed by a quarter dose in the second week. Participants could discontinue faster if they wished. Captodiamine was continued in the absence of BZD then all treatment was discontinued at the final study visit.                                        | Placebo    |
| Miller et al. (2019). Canada        | Protocol registration for a quasi-experimental, interrupted time series design and evaluation | Target of 80 patients aged 18 years and older with chronic pain and taking opioid medications           | Changes in opioid use, pain severity, pain interference and occurrence of adverse events | Opioids                                          | Academic detailing sessions for GPs and nurse practitioners (conducted by a pharmacist) focusing on opioid deprescribing. Pharmacist and healthcare professionals develop a patient-centred opioid taper schedule which includes follow-up at 2 to 4 week intervals. Patients receive a self-management intervention which consists of 2 visits per week over 6 weeks: 1 visit is a 1.5-hour group education session, the 2 <sup>nd</sup> visit is a 30-minute one-on-one session of individually tailored to support implementation of self-management plans and an exercise program. | N/A        |
| Monteiro et al. (2017). Portugal    | Protocol registration for a cluster RCT                                                       | Target of 280 aged 65 years and older taking PIM (specifically BZD and non-BZD hypnotics)               | Change in BZD and non-BZD hypnotic consumption at 3, 6, 12 months                        | Benzodiazepines and Non-benzodiazepine hypnotics | Intervention group GPs given a guide on deprescribing in the form of an electronic tool, designed to support clinical decisions. Tool includes information on prescribing, deprescribing and an interactive tapering regime.                                                                                                                                                                                                                                                                                                                                                           | Usual care |

| Study details                           | Study design               | Participants                                                                                                                                                                        | Primary outcome/s                                                                             | Medication to be deprescribed | Intervention elements                                                                                                                                                                                                                                                                                                                                                                                                                                                                                                                                                 | Comparison |
|-----------------------------------------|----------------------------|-------------------------------------------------------------------------------------------------------------------------------------------------------------------------------------|-----------------------------------------------------------------------------------------------|-------------------------------|-----------------------------------------------------------------------------------------------------------------------------------------------------------------------------------------------------------------------------------------------------------------------------------------------------------------------------------------------------------------------------------------------------------------------------------------------------------------------------------------------------------------------------------------------------------------------|------------|
| Murie et al. (2012). UK                 | Intervention study         | 166 patients aged 18 years and older with gastro-oesophageal reflux disease and nonulcerative dyspepsia taking PPIs long term (minimum of 2 consecutive months repeat prescription) | No. of patients that successfully reduce or stop taking PPIs                                  | PPIs                          | Patients attended a 20-minute clinic appointment with a specialised nurse where they receive verbal and written educational information about their condition, alternative treatment options, and risk factor management. Patients assisted in formulating specific action plans to reduce and/or stop PPI use. Additional appointments were offered according to individual needs. Patients also offered a prescription for alternative medication.                                                                                                                  | N/A        |
| Muskens et al. (2013). Netherlands      | Protocol for a cluster RCT | 146 patients with a prescription for antidepressants for at least 9 months                                                                                                          | Successful discontinuation of antidepressant use                                              | Antidepressants               | GP received a letter stating that the patient does not meet criteria for a depressive or anxiety disorder in past 6 months, as well as an information sheet with current guidelines on antidepressant tapering, a suggested tapering regime and information. Gradual tapering program is based on the dosage and half-life of the individual antidepressant.                                                                                                                                                                                                          | Usual care |
| Oude Voshaar et al. (2003). Netherlands | RCT                        | 180 long-term (use for at least 3 months with a prescribed amount of at least 60 days consumption) (Int 1 n = 73, Int 2 n = 73, Con n = 34)                                         | Proportion of patients who successfully discontinued long-term BZD use                        | BZD                           | Intervention 1: Patients not already taking diazepam were transferred to an equivalent dose for 2 weeks and then reduced by 25% each week for 4 weeks (at a weekly visit). Dose could be divided into two steps of 12.5% for 4 days in the last week. GP completed a case record form which monitored progress and any adverse events.<br>Intervention 2: intervention 1 combined with 5 weekly x 2-hour group cognitive behavioural therapy sessions (commenced halfway through tapering period). Sessions were led by a psychologist.                               | Usual care |
| Rankin et al. (2021). Ireland           | Protocol for a pilot study | Target of 12 general practices. No. of GPs not specified. 120 patients (10 patients per site).                                                                                      | Unspecified variables relating to the feasibility of the study and medication appropriateness | Polypharmacy (4+ medications) | Online video for GPs demonstrating how GPs can improve polypharmacy during appointments with patients. Video contains information to enable appropriate polypharmacy rather than introducing new behaviours. GPs also receive prompts from reception staff as a reminder to conduct medication review. GPs to discuss medication review schedule at practice meetings with staff. Practice staff receive information sheet outlining involvement in the pilot. Patients are invited to medication review at two timepoints: initial review and then again in 6m time. | Usual care |

| Study details                                         | Study design                                                     | Participants                                                                                                                                                                                                                        | Primary outcome/s                                                                                                                | Medication to be deprescribed | Intervention elements                                                                                                                                                                                                                                                                                                                                                                                                                                                                                                                                          | Comparison                                                             |
|-------------------------------------------------------|------------------------------------------------------------------|-------------------------------------------------------------------------------------------------------------------------------------------------------------------------------------------------------------------------------------|----------------------------------------------------------------------------------------------------------------------------------|-------------------------------|----------------------------------------------------------------------------------------------------------------------------------------------------------------------------------------------------------------------------------------------------------------------------------------------------------------------------------------------------------------------------------------------------------------------------------------------------------------------------------------------------------------------------------------------------------------|------------------------------------------------------------------------|
| Saffar et al. (2018). USA                             | Protocol registration for a cluster RCT and formative evaluation | Target of 1500 veterans                                                                                                                                                                                                             | Proportion of days PPIs are prescribed in the 12 months following the index visit                                                | PPIs                          | PPI deprescribing program that includes alerts to clinical pharmacy specialist and primary care providers. Alerts inform them of patients who meet criteria for PPI deprescription and who are scheduled for an upcoming appointment.                                                                                                                                                                                                                                                                                                                          | Usual care                                                             |
| Sheppard et al. (2018). UK                            | Protocol for a RCT                                               | Target of 540 patients aged $\geq 80$ years receiving antihypertensive medications with compelling indication for medication continuation                                                                                           | Proportion of participants with clinically acceptable blood pressure levels at 12-week follow-up                                 | Antihypertensives             | GPs review antihypertensive medication regimen and decide which medication should be removed (decision informed by existing guidelines and patients comorbidities). Reduction of one medication will be in reverse of an algorithm for older patients. GPs or other healthcare professional will closely monitor participant's response to medication reduction. All participants have at least one routine safety follow-up visit, with additional visits as needed. Participants will also be given the option to self-monitor their blood pressure at home. | Usual care                                                             |
| Sonnichsen et al. (2016). Germany, UK, Austria, Italy | Protocol for a cluster RCT                                       | Target of 325 GPs and 3575 patients aged 75 years with multimorbidity                                                                                                                                                               | Composite endpoint of first non-elective hospital admission or death during the observation period                               | Polypharmacy (8+ medications) | GPs will be given access to an electronic medication review tool called the PRIMA-eDS decision support tool. The tool analyses patient information and produces recommendations for drug discontinuation or modification.                                                                                                                                                                                                                                                                                                                                      | Usual care. GPs asked to record medication and other data for patients |
| Sullivan et al (2020). USA                            | Nested case-control study                                        | 2409 patients aged 18 years and older with long-term opioid use (two consecutive quarters of opioid prescriptions with $\geq 60$ day supply) and a daily dose of $\geq 50$ mg morphine equivalent (MME) (Int n = 894, Con n = 3576) | Opioid dose in each calendar quarter was the moving average of the current and immediately preceding quarter's average daily MME | Opioids                       | Opioid taper plans documented by primary care providers in the electronic health record                                                                                                                                                                                                                                                                                                                                                                                                                                                                        | Patients without sustained taper (matched controls)                    |

| Study details            | Study design                                         | Participants                                                                                  | Primary outcome/s                                                                                                                                                                                                                                                          | Medication to be deprescribed                                 | Intervention elements                                                                                                                                                                                                                                                                                                                                                                                                                                                                                                                                                                                                                                                                                                                                                                                                                                                                                                                                                                                                                                                                                                                                                                                                                                 | Comparison |
|--------------------------|------------------------------------------------------|-----------------------------------------------------------------------------------------------|----------------------------------------------------------------------------------------------------------------------------------------------------------------------------------------------------------------------------------------------------------------------------|---------------------------------------------------------------|-------------------------------------------------------------------------------------------------------------------------------------------------------------------------------------------------------------------------------------------------------------------------------------------------------------------------------------------------------------------------------------------------------------------------------------------------------------------------------------------------------------------------------------------------------------------------------------------------------------------------------------------------------------------------------------------------------------------------------------------------------------------------------------------------------------------------------------------------------------------------------------------------------------------------------------------------------------------------------------------------------------------------------------------------------------------------------------------------------------------------------------------------------------------------------------------------------------------------------------------------------|------------|
| Towle et al. (2006). UK  | Intervention study                                   | 369 patients aged 70 years and older with a repeat BZD prescription                           | No. of pts on a repeat prescription for a benzo between baseline and the end of the study period (3 years)                                                                                                                                                                 | BZD                                                           | A new prescribing policy was agreed upon with GPs and implemented into practice. Included: initiation of a voluntary ban on prescribing BZD, maximum 28 day prescribing interval, agreement on a withdrawal protocol, issuing all new diazepam prescriptions in the 2mg formulation. New protocol was promoted via posters displayed in the practice and all staff were educated about systems to minimise inappropriate prescriptions. Patients considered for withdrawal received a letter informing them of the withdrawal policy and encouraged them to make an appointment with their GP. At review, GP conducted a structured interview which included information about the withdrawal policy, general support and non-pharmacological alternatives to coping with stress or insomnia. Patients had their BZD inactivated from repeat prescription. Each BZD was converted to an equivalent diazepam dose and the reduced at a rate considered appropriate. All prescriptions issued on acute prescription. Withdrawal regimens generally kept to a maximum of 8 weeks per prescription. Withdrawal chart and prescription prepared by pharmacist and recorded in patient medical records. Patients received a copy of the withdrawal regimen. | N/A        |
| Vejar et al. (2013). USA | Before and after study (Quality improvement project) | 1580 manual chart audits and 903 patient surveys. Patients aged between 51 years to 102 years | Documentation of medication reconciliation, percentage of patients bringing medication to appointment, reduction of potentially dangerous over the counter medications, reduction in the use of the duplicate medications and potential drug-drug interactions was desired | PIM (Diphenhydramine, Tylenol PM, naproxen, ibuprofen, other) | Improving medication reconciliation by: <ul style="list-style-type: none"> <li>• Reminder to patients to bring medications to clinic visit.</li> <li>• Medication management educational flyers for patients in exam rooms. Education for patients regarding over the counter medications. Patients completed a detailed questionnaire. Medical assistant supported patient education and data collection.</li> <li>• Provider education one-on-ones, email, and at meetings in group settings.</li> <li>• Reminders to provider to document medication reconciliation in each exam room and via medical records.</li> <li>• Training for providers for new medical record system.</li> </ul>                                                                                                                                                                                                                                                                                                                                                                                                                                                                                                                                                         | N/A        |

| Study details                | Study design                                                          | Participants                                                                                                                                  | Primary outcome/s                                                                                                                                                              | Medication to be deprescribed | Intervention elements                                                                                                                                                                                                                                                                                                                                                                                                                                                                                                                                                                                                                                                                                                                                                               | Comparison                                                            |
|------------------------------|-----------------------------------------------------------------------|-----------------------------------------------------------------------------------------------------------------------------------------------|--------------------------------------------------------------------------------------------------------------------------------------------------------------------------------|-------------------------------|-------------------------------------------------------------------------------------------------------------------------------------------------------------------------------------------------------------------------------------------------------------------------------------------------------------------------------------------------------------------------------------------------------------------------------------------------------------------------------------------------------------------------------------------------------------------------------------------------------------------------------------------------------------------------------------------------------------------------------------------------------------------------------------|-----------------------------------------------------------------------|
| Vicens et al. (2006). Spain  | RCT                                                                   | 139 patients aged between 14 years to 75 years taking a BZD at least 5 times a week for over a year (Int n = 73, Con n = 66)                  | BZD use at 12 month (success, no use or no more than once every 15 days; reduced, at least a 50% reduction in initial dose; failure, no change or a decrease smaller than 50%) | BZD                           | A 15-20 minute interview with a standardised message (about BZD use and withdrawal. Patients underwent a stepwise dose reduction with control visits every 15 days. Dose reduced b/n 10% and 25% of the initial dose fortnightly. Follow-up appointments lasted 10 minutes. GPs given 2-hour training workshop regarding administration of questionnaires, structured interview, tapering guidelines.                                                                                                                                                                                                                                                                                                                                                                               | Usual care and informed of the convenience of reducing the use of BZD |
| Vicens et al. (2016). Spain  | Cluster RCT                                                           | 75 GPs and 532 patients aged between 18 years and 80 years taking BZD daily for at least 6 months (Int 1 n = 191, Int 2 n = 168, Con n = 173) | BZD cessation (defined as no prescription in the last 6m)                                                                                                                      | BZD                           | GPs attended a 2-hour workshop on BZD discontinuation. Patients in each group received initial structured educational interview with individualised stepped dose reduction (either intervention 1 or 2).<br><ul style="list-style-type: none"> <li>Intervention 1: structured intervention with stepped dose reduction and follow-up visits (SIF). Patients scheduled for follow-up appointments with their GPs every 2-3 weeks until end of dose reduction period.</li> <li>Intervention 2 = structured intervention with written stepped dose reduction (SIW). Patients received written instructions with reinforcing information and tailored gradual dose-reduction until cessation. Gradual taper consisted of 10-25% reduction in the daily dose every 2-3 weeks.</li> </ul> | Usual care                                                            |
| Vicens et al. (2019). Spain  | Protocol for a Cluster RCT                                            | Target of 638 GPs (319 in each arm)                                                                                                           | GPs' DHD defined daily dosage per 1000 inhabitants per day) of BZDs at 12 months after the training workshop.                                                                  | BZD                           | Multifactorial intervention consisting of 3 parts:<br>1. 2-hour educational workshop training for GPs which includes rationale for prescribing BZDs and strategies for deprescribing long-term BZD use.<br>2. Monthly audit and feedback for participating GPs.<br>3. GPs to be given general BZD information (rationales and effective strategies for discontinuation etc) via a training and support web page.                                                                                                                                                                                                                                                                                                                                                                    | Usual care                                                            |
| Walsh et al. (2010). Ireland | Prospective cohort study (randomised selection of study participants) | 50 patients aged 65 years and older receiving repeat prescriptions for 2 or more medications                                                  | Total number of medications actually taken, total number of medications appearing on patient computerised record                                                               | Polypharmacy (2+ medications) | Patients were contacted by telephone to invite them to attend a review. The 10-minute medication review comprising of updating actual medications being taken by patients, errors in dosage, inappropriate medications being taken, etc. Patients were informed that all over the counter preparations could interact with prescribed medication. Patients attended a follow-up appointment with their GP following any change to medication. Four weeks following review, telephone contact was made with patients.                                                                                                                                                                                                                                                                | Not specified                                                         |



| Study details                      | Study design                | Participants                                                                                                                  | Primary outcome/s                                                                                                                         | Medication to be deprescribed | Intervention elements                                                                                                                                                                                                                                                                                                                                                                                                                                                                                                                                                                                                                                                                                                                                                                                                                                                                                                                          | Comparison                         |
|------------------------------------|-----------------------------|-------------------------------------------------------------------------------------------------------------------------------|-------------------------------------------------------------------------------------------------------------------------------------------|-------------------------------|------------------------------------------------------------------------------------------------------------------------------------------------------------------------------------------------------------------------------------------------------------------------------------------------------------------------------------------------------------------------------------------------------------------------------------------------------------------------------------------------------------------------------------------------------------------------------------------------------------------------------------------------------------------------------------------------------------------------------------------------------------------------------------------------------------------------------------------------------------------------------------------------------------------------------------------------|------------------------------------|
| Walsh et al (2016). Canada         | Quality improvement project | 46 patients aged 18 years and older taking PPOs for 8 weeks                                                                   | PPI reassessment at 10 weeks after visit (determined by patient chart review) and primary care provider perceptions of tool and processes | PPIs                          | An electronic medical record alert advised primary care provider of an upcoming appointment with an eligible patient. Appointments were usual periodic health examinations. A PPI deprescribing tool document containing guidelines and information regarding PPIs was uploaded into the patient's medical record as a second reminder and to assist with reassessment and deprescribing process. Patients received a handout to help them understand the harms associated with long-term PPIs use and provided guidance on the tapering process, which was also uploaded into their medical record.                                                                                                                                                                                                                                                                                                                                           | N/A                                |
| Wentink et al. (2019). Netherlands | Protocol for a cluster RCT  | Target of 138 patients 18 years and older                                                                                     | Full discontinuation of antidepressant medication (= 0 mg) within 6 months after starting the intervention                                | Antidepressants               | SPD + MBCT:<br><ul style="list-style-type: none"> <li>Supported protocolised discontinuation (SPD) intervention = Patients will make a personal tapering schedule with their GP. Also offered supportive meetings with a mental health assistant. Patients advised to discontinue medication within 6 months.</li> <li>Mindfulness based cognitive therapy (MBCT) intervention = sessions 1-4 take place on a weekly basis, and session 5-8 on a fortnightly basis. Each session lasts for 2.5 hours with a 6-hour silent day between session 6 and 7. Participants also instructed to practice mindfulness for approximately 30 minutes a day. Participants receive a link to download guided meditations and yoga exercises for home practice and psycho-education about depression and the pros and cons of stopping antidepressants. The mental health assistant will receive basic information about discontinuation guidance.</li> </ul> | SPD only                           |
| Zitman et al. (2001). Netherlands  | Placebo controlled study    | 230 patients aged 18 years and older with major depressive disorder and chronic BZD use (daily for use for at least 3 months) | Long-term effect of the discontinuation program                                                                                           | BZD                           | 3 Phase discontinuation: 1. change to equivalent dose of diazepam; 2. subsequent randomisation to either 20mg of paroxetine or placebo (patients with a low depression score went onto phase 3); 3. gradual reduction of diazepam. Daily dose was reduced by 25% in week 1 and 2, the remaining 50% was tapered off in 4 steps of 12.5% in weeks 3 and 4. Patients continued treatment with study medication for 2 weeks, followed by 3 weeks of no psychotropic medication.                                                                                                                                                                                                                                                                                                                                                                                                                                                                   | Transfer to diazepam, then placebo |

BZD = Benzodiazepine.

ED = Emergency Department.  
GHQ = General Health Questionnaire. Measure of current mental health. Goldberg.  
RCT = Randomised Controlled Trial.  
MCI = Mild Cognitive Impairment.  
PIM = Potentially Inappropriate Medication.  
rPATDcog = Patients' Attitudes Towards Deprescribing for cognitive impairment.  
PPMD = Prescribers' Perceptions of Medication Discontinuation.  
PPI = Proton Pump Inhibitors  
CVD = cardiovascular disease
